# Supplementary material
Source: PubMed Central journal article supplement (PMC10917081)
Supplement: NIHMS1964290-supplement-1.pdf [file NIHMS1964290-supplement-1.pdf]

|                                                       |     |       |      |                     |     |       |      |                     |     |       |      |                  |    |       |      |                  |
|-------------------------------------------------------|-----|-------|------|---------------------|-----|-------|------|---------------------|-----|-------|------|------------------|----|-------|------|------------------|
| Female                                                | 270 | 6,307 | 61.1 | (55.8<br>-<br>66.4) | 126 | 2,511 | 31.9 | (24.3<br>-<br>39.5) | 250 | 4,347 | 58.9 | (50.7 -<br>67.1) | 34 | 431   | 37.1 | (20.1 -<br>54)   |
| Male                                                  | 184 | 4,012 | 38.9 | (33.6<br>-<br>44.2) | 306 | 5,359 | 68.1 | (60.5<br>-<br>75.7) | 167 | 3,035 | 41.1 | (32.9 -<br>49.3) | 59 | 733   | 62.9 | (46 -<br>79.9)   |
| <b>Disposition<sup>d</sup></b>                        |     |       |      |                     |     |       |      |                     |     |       |      |                  |    |       |      |                  |
| Hospitalized                                          | 38  | 912   | 8.8  | (5.9<br>-<br>11.8)  | 152 | 2,385 | 30.3 | (21.1<br>-<br>39.6) | 341 | 5,649 | 76.5 | (68.9 -<br>84.2) | 17 | --    | --   | --               |
| Treated/released<br>or left against medical<br>advice | 416 | 9,407 | 91.2 | (88.2<br>-<br>94.1) | 278 | 5,427 | 69.0 | (58.7<br>-<br>79.2) | 76  | 1,733 | 23.5 | (15.8 -<br>31.1) | 76 | 1,003 | 86.2 | (75.2 -<br>97.3) |
| <b>Type of Nonmedical<br/>Use</b>                     |     |       |      |                     |     |       |      |                     |     |       |      |                  |    |       |      |                  |
| Abuse                                                 | NA  | NA    | NA   | NA                  | 273 | 4,929 | 62.6 | (54.5<br>-<br>70.7) | NA  | NA    | NA   | NA               | NA | NA    | NA   | NA               |
| Misuse                                                | NA  | NA    | NA   | NA                  | 62  | 1,200 | 15.2 | (10.7<br>-<br>19.8) | NA  | NA    | NA   | NA               | NA | NA    | NA   | NA               |
| Overdose<br>without indication of<br>intent           | NA  | NA    | NA   | NA                  | 97  | 1,740 | 22.1 | (14.6<br>-<br>29.6) | NA  | NA    | NA   | NA               | NA | NA    | NA   | NA               |
| <b>No. of Implicated<br/>Medications</b>              |     |       |      |                     |     |       |      |                     |     |       |      |                  |    |       |      |                  |
| 1                                                     | 345 | 7,959 | 77.1 | (72.2<br>-<br>82)   | 321 | 5,721 | 72.7 | (66.2<br>-<br>79.2) | 187 | 3,143 | 42.6 | (37.5 -<br>47.7) | 85 | 1,065 | 91.5 | (78.2 -<br>100)  |
| 2                                                     | 85  | 1,873 | 18.2 | (13.8<br>-<br>22.5) | 72  | 1,359 | 17.3 | (11.4<br>-<br>23.1) | 122 | 2,364 | 32.0 | (25 -<br>39)     | 5  | --    | --   | --               |

|              |            |               |              |    |            |              |              |              |            |              |              |              |           |              |              |    |
|--------------|------------|---------------|--------------|----|------------|--------------|--------------|--------------|------------|--------------|--------------|--------------|-----------|--------------|--------------|----|
| 3            | 11         | --            | --           | -- | 24         | 602          | 7.6          | (4.2 - 11.1) | 66         | 1,094        | 14.8         | (9.8 - 19.8) | 2         | --           | --           | -- |
| 4 or more    | 13         | --            | --           | -- | 15         | --           | --           | --           | 42         | 781          | 10.6         | (6.4 - 14.7) | 1         | --           | --           | -- |
| <b>Total</b> | <b>454</b> | <b>10,319</b> | <b>100.0</b> |    | <b>432</b> | <b>7,870</b> | <b>100.0</b> |              | <b>417</b> | <b>7,382</b> | <b>100.0</b> |              | <b>93</b> | <b>1,164</b> | <b>100.0</b> |    |

CI = confidence interval. NA = not applicable.

<sup>a</sup>Estimates are from the National Electronic Injury Surveillance System–Cooperative Adverse Drug Event Surveillance project, Centers for Disease Control and Prevention. Estimates based on <20 cases or total estimates <1200 for the study period are considered statistically unstable and are not shown (--).

<sup>b</sup>Nonmedical use includes abuse (clinician diagnosis of abuse or documentation of recreational use), misuse (using medication for symptom relief, but not using medication as directed), and overdoses without documentation of therapeutic intent, misuse, abuse, or self-harm.

<sup>c</sup>Coefficient of variation >30%.

<sup>d</sup>Missing for 2 cases of ED visits for harms from nonmedical CCM use.

**Supplement 2. Concurrent Substances Commonly Involved in Emergency Department (ED) Visits for Over-the-Counter (OTC) Cough and Cold Medication (CCM)-related Harms, 2017-2019<sup>a</sup>**

| Concurrent substance <sup>b</sup>                                                                                | Therapeutic Use |                 |      |               | Nonmedical Use <sup>c</sup> |                 |      |               | Self-harm using CCMs |                 |      |               |
|------------------------------------------------------------------------------------------------------------------|-----------------|-----------------|------|---------------|-----------------------------|-----------------|------|---------------|----------------------|-----------------|------|---------------|
|                                                                                                                  | Cases           | Annual Estimate |      |               | Cases                       | Annual Estimate |      |               | Cases                | Annual Estimate |      |               |
|                                                                                                                  | No.             | No.             | %    | 95% CI        | No.                         | No.             | %    | 95% CI        |                      | No.             | %    | 95% CI        |
| <b>OTC cough and cold medications alone</b><br>(without other medications, illicit drugs, or alcohol)            | 356             | 8,184           | 79.3 | (74.3 - 84.3) | 177                         | 3,042           | 38.7 | (30.0 - 47.3) | 114                  | 1,779           | 24.1 | (17.5 - 30.6) |
| <b>OTC cough and cold medications with other medications</b><br>(Alcohol and illicit drugs may also be involved) | 91              | 1,931           | 18.7 | (13.9 - 23.6) | 104                         | 2,051           | 26.1 | (19.4 - 32.7) | 220                  | 4,050           | 54.9 | (49.3 - 60.5) |
| Antibiotics                                                                                                      | 22              | 525             | 5.1  | (2.7 - 7.5)   | 2                           | --              | --   | --            | 7                    | --              | --   | --            |
| Non-opioid acetaminophen-containing analgesics                                                                   | 6               | --              | --   | --            | 8                           | --              | --   | --            | 72                   | 1,229           | 16.6 | (12.7 - 20.6) |
| Antihistamines                                                                                                   | 17              | --              | --   | --            | 18                          | --              | --   | --            | 51                   | 1,020           | 13.8 | (10.1 - 17.5) |
| Antidepressants                                                                                                  | 11              | --              | --   | --            | 6                           | --              | --   | --            | 29                   | 582             | 7.9  | (4.2 - 11.5)  |
| Benzodiazepines                                                                                                  | 4               | --              | --   | --            | 36                          | 862             | 11.0 | (6.0 - 15.9)  | 22                   | 569             | 7.7  | (4.2 - 11.2)  |
| Non-steroidal anti-inflammatory drugs (NSAIDs)                                                                   | 6               | --              | --   | --            | 4                           | --              | --   | --            | 57                   | 872             | 11.8 | (9.3 - 14.4)  |
| Prescription opioids                                                                                             | 2               | --              | --   | --            | 19                          | --              | --   | --            | 18                   | --              | --   | --            |
| Other classes of medications                                                                                     | 31              | 622             | 6.0  | (3.7 - 8.4)   | 27                          | 447             | 5.7  | (2.5 - 8.8)   | 34                   | 611             | 8.3  | (4.2 - 12.3)  |
| <b>OTC cough and cold medications with alcohol</b><br>(Other medications and illicit drugs may also be involved) | 8               | --              | --   | --            | 79                          | 1,637           | 20.8 | (15.0 - 26.7) | 81                   | 1,823           | 24.7 | (17.8 - 31.6) |

|                                                                                                                                                                                                                                                                                                                                                                                                                                  |   |    |    |    |     |                  |      |               |     |       |      |               |
|----------------------------------------------------------------------------------------------------------------------------------------------------------------------------------------------------------------------------------------------------------------------------------------------------------------------------------------------------------------------------------------------------------------------------------|---|----|----|----|-----|------------------|------|---------------|-----|-------|------|---------------|
| <b>OTC cough and cold medications with illicit drugs</b><br>Other medications and alcohol may also be involved)                                                                                                                                                                                                                                                                                                                  | 4 | -- | -- | -- | 165 | 3,079            | 39.1 | (28.4 - 49.9) | 108 | 2,017 | 27.3 | (22.5 - 32.1) |
| Marijuana                                                                                                                                                                                                                                                                                                                                                                                                                        | 2 | -- | -- | -- | 103 | 1,910            | 24.3 | (15.3 - 33.2) | 78  | 1,449 | 19.6 | (15.5 - 23.7) |
| Illicit opioids (heroin, fentanyl, unspecified opioids)                                                                                                                                                                                                                                                                                                                                                                          | 0 | -- | -- | -- | 36  | 614 <sup>d</sup> | 7.8  | (3.3 - 12.3)  | 14  | --    | --   | --            |
| Illicit stimulants (cocaine, methamphetamine, unspecified amphetamines)                                                                                                                                                                                                                                                                                                                                                          | 0 | -- | -- | -- | 52  | 1,067            | 13.6 | (8.8 - 18.4)  | 27  | 577   | 7.8  | (4.5 - 11.2)  |
| <sup>a</sup> Estimates are from the National Electronic Injury Surveillance System–Cooperative Adverse Drug Event Surveillance project, Centers for Disease Control and Prevention. Estimates based on <20 cases or total estimates <1200 for the study period are considered statistically unstable and are not shown (--). ED visits for unsupervised pediatric CCM exposures are not shown (1,164 estimated visits annually). |   |    |    |    |     |                  |      |               |     |       |      |               |
| <sup>b</sup> Illicit drugs include specified illicit substances (e.g., heroin, cocaine), as well as unspecified opioids and unspecified amphetamines (e.g., documentation of opioid ingestion, but unclear whether prescription opioids or illicit opioids were taken).                                                                                                                                                          |   |    |    |    |     |                  |      |               |     |       |      |               |
| <sup>c</sup> Nonmedical use includes abuse (clinician diagnosis of abuse or documentation of recreational use), misuse (using medication for symptom relief, but not using medication as directed), and overdoses without documentation of therapeutic intent, misuse, abuse, or self-harm.                                                                                                                                      |   |    |    |    |     |                  |      |               |     |       |      |               |
| <sup>d</sup> Coefficient of variation >30%.                                                                                                                                                                                                                                                                                                                                                                                      |   |    |    |    |     |                  |      |               |     |       |      |               |

**Supplement 3. National Estimates of Emergency Department (ED) Visits for Harms Attributed to Over-the-Counter (OTC) Cough and Cold Medications (CCMs), by Clinical Manifestations and Concurrent Substance Use, 2017-2019<sup>a</sup>**

| Manifestations <sup>b</sup>                        | OTC CCMs Only |                 |              |               | OTC CCMs with Other Substances |                 |              |               |
|----------------------------------------------------|---------------|-----------------|--------------|---------------|--------------------------------|-----------------|--------------|---------------|
|                                                    | Cases         | Annual Estimate |              |               | Cases                          | Annual Estimate |              |               |
|                                                    | No.           | No.             | %            | 95% CI        | No.                            | No.             | %            | 95% CI        |
| Severe allergic reaction                           | 48            | 1,049           | 7.4          | (4.8 - 10.0)  | 9                              | --              | --           | --            |
| Altered mental status/unresponsiveness             | 126           | 2,207           | 15.6         | (11.9 - 19.4) | 214                            | 4,301           | 34.1         | (27.7 - 40.5) |
| Presyncope/syncope/fall/injury                     | 59            | 1,305           | 9.2          | (6.5 - 12.0)  | 37                             | 637             | 5.0          | (2.7 - 7.4)   |
| Psychiatric or other central nervous system effect | 61            | 1,358           | 9.6          | (6.5 - 12.8)  | 33                             | 677             | 5.4          | (3.3 - 7.4)   |
| Cardiovascular effect                              | 44            | 1,207           | 8.6          | (5.6 - 11.5)  | 27                             | 556             | 4.4          | (2.5 - 6.3)   |
| Mild-to-moderate allergic reaction                 | 112           | 2,514           | 17.8         | (13.1 - 22.5) | 21                             | --              | --           | --            |
| Other effect                                       | 48            | 842             | 6.0          | (3.5 - 8.4)   | 41                             | 767             | 6.1          | (3.9 - 8.2)   |
| Increased drug level only                          | 11            | --              | --           | --            | 37                             | 676             | 5.4          | (3.7 - 7)     |
| No documented clinical manifestations              | 224           | 3,484           | 24.7         | (19.0 - 30.3) | 244                            | 4,383           | 34.7         | (27.6 - 41.9) |
| <b>Total</b>                                       | <b>733</b>    | <b>14,111</b>   | <b>100.0</b> |               | <b>663</b>                     | <b>12,624</b>   | <b>100.0</b> |               |

CI = confidence interval.

<sup>a</sup>Estimates are from the National Electronic Injury Surveillance System–Cooperative Adverse Drug Event Surveillance project, Centers for Disease Control and Prevention. Estimates based on <20 cases or total estimates <1200 for the study period are considered statistically unstable and are not shown (--).

<sup>b</sup>Clinical manifestations were categorized in a mutually exclusive and hierarchical manner (e.g., a case involving depressed consciousness and nausea would be classified as altered mental status/unresponsiveness based on the depressed consciousness).
